# Supplementary material for: FPGS relapse-specific mutations in relapsed childhood acute lymphoblastic leukemia
Source: PubMed Central journal article supplement (PMC7374087; doi:10.1038/s41598-020-69059-y), 2020-07-21
Supplement: 41598_2020_69059_MOESM1_ESM.pdf [file 41598_2020_69059_MOESM1_ESM.pdf]

## ***FPGS relapse-specific mutations in relapsed childhood acute lymphoblastic leukemia***

Sung-Liang Yu<sup>1,2,3,4,5,6\*</sup>, Hui Zhang<sup>7\*</sup>, Bing-Ching Ho<sup>1</sup>, Chih-Hsiang Yu<sup>2</sup>, Chia-Ching Chang<sup>2</sup>, Yin-Chen Hsu<sup>2</sup>, Yu-Ling Ni<sup>3</sup>, Kai-Hsin Lin<sup>8</sup>, Shiann-Tarng Jou<sup>8</sup>, Meng-Yao Lu<sup>8</sup>, Shu-Huey Chen<sup>9</sup>, Kang-Hsi Wu<sup>10</sup>, Shih-Chung Wang<sup>11</sup>, Hsiu-Hao Chang<sup>8</sup>, Ching-Hon Pui<sup>12</sup>, Jun J Yang<sup>13</sup>, Jinghui Zhang<sup>14</sup>, Dong-Tsamn Lin<sup>3,8</sup>, Shu-Wha Lin<sup>2</sup>, Xiaotu Ma<sup>14</sup>, Yung-Li Yang<sup>3,8</sup>

<sup>1</sup>Centers of Genomic and Precision Medicine, National Taiwan University, Taipei, Taiwan

<sup>2</sup>Department of Clinical Laboratory Sciences and Medical Biotechnology, College of Medicine, National Taiwan University, Taipei, Taiwan

<sup>3</sup>Department of Laboratory Medicine, National Taiwan University Hospital and National Taiwan University College of Medicine, Taipei, Taiwan;

<sup>4</sup>Institute of Medical Device and Imaging, College of Medicine, National Taiwan University, Taipei, Taiwan

<sup>5</sup>Graduate Institute of Pathology, College of Medicine, National Taiwan University, Taipei, Taiwan

<sup>6</sup>Graduate Institute of Clinical Medicine, National Taiwan University College of Medicine, Taipei, Taiwan

<sup>7</sup>Department of Hematology & Oncology, Guangzhou Women and Children's Medical Center, Guangzhou, Guangdong, China

<sup>8</sup>Department of Pediatrics, National Taiwan University Hospital and National Taiwan University College of Medicine, Taipei, Taiwan;

<sup>9</sup>Department of Pediatrics, Taipei Medical University–Shuang Ho Hospital, Taipei, Taiwan;

<sup>10</sup>Division of Pediatric Hematology &Oncology, China Medical University Children's Hospital, Taichung, Taiwan;

<sup>11</sup>Department of Pediatrics, Changhua Christian Hospital, Changhua, Taiwan.

<sup>12</sup>Department of Oncology, St. Jude Children's Research Hospital, Memphis, Tennessee, USA

<sup>13</sup>Department of Pharmaceutical Sciences, St. Jude Children's Research Hospital, Memphis, Tennessee, USA

<sup>14</sup>Department of Computational Biology, St. Jude Children's Research Hospital, Memphis, Tennessee, USA

\*These authors contributed equally to this work: Sung-Liang Yu and Hui Zhang

**Corresponding author:**

Yung-Li Yang

Department of Laboratory Medicine, National Taiwan University Hospital and National Taiwan University College of Medicine, Taipei, Taiwan;

No. 7, Chung Shan S. Rd, Zhongshan S. Rd, Zhongzheng Dist, Taipei 100, Taiwan, R.O.C.

Tel.: +886-2-23123456-71712

Fax:+886-2-23224263

E-mail: yangyl92@ntu.edu.tw

Supplementary Table 1. Primer sequences

|                                | Sequence (5' to 3')                         |
|--------------------------------|---------------------------------------------|
| <b>Custom TaqMan SNP assay</b> |                                             |
| FPGS_R419W forward primer      | TTCGAGTCTTGCTCTTCAATGCTA                    |
| FPGS_R419W reverse primer      | TCACCTGCAGCAGCTTCA                          |
| Reporter 1-FAM-NFQ             | CCGGGTCCCGGTCC                              |
| Reporter 1- VIC-NFQ            | CCGGGTCCCAGTCC                              |
| <b>Artificial amplicon</b>     |                                             |
| FPGS-F                         | GCCCCTCACCTGGTACCTG                         |
| FPGS-R                         | AGAGGCAAACCTGAGGCTCGG                       |
| FPGS-mF                        | GCCGCCGGGTCCC <sub>a</sub> GTC <sub>c</sub> |
| FPGS-mR                        | GGAC <sub>t</sub> GGGACCCGGCGGC             |
| <b>Sanger validation</b>       |                                             |
| FPGS_R419W F                   | GGTCCTGAGTGTTGAGGGCGG                       |
| FPGS_R419W R                   | AGGGGGAGGGGATTGGCACC                        |
| FPGS_R141H/V136F F             | GGGGCACCAGGAACAAACCG                        |
| FPGS_R141H/V136F R             | ACCTCCACCACTGCCAGGTC                        |
| FPGS_K215_V218delinsSP F       | GCGGGGCTTATGACTGCACC                        |
| FPGS_K215_V218delinsSP R       | TCCAGTCACACAGTGAAGCCAGG                     |
| NT5C2_R39Q F                   | TCAAACAGCATGTTCGTGTTATACATC                 |
| NT5C2_R39Q R                   | GCTTCTGGCAGCCAAATACA                        |
| NT5C2_R238W F                  | AGGTTCCCCCATTCTGTTGTGG                      |
| NT5C2_R238W R                  | AAGGGGTGTGACTGCTCAAGTTT                     |
| NT5C2_R367Q F                  | GCTCTGGTCAGCACAGTGGAGC                      |
| NT5C2_R367Q R                  | CCTGCCTTTTGACCACCTCTGACT                    |
| PRPS1_P106A F                  | TCTGGGTACCATAGTGCCTTTAACA                   |
| PRPS1_P106A R                  | ACTGCCTCCCTATCTAACCACCTG                    |
| PRPS1_A190T F                  | TATTCTCCTCCCCAAAACAAGCCCA                   |
| PRPS1_A190T R                  | TACCAGCCCCATCAATCCACACTTA                   |

Supplementary Table 3. Time to relapse, overall survival and MAF of relapsed childhood ALL patients with *FPGS*, *NT5C2* or *PRPS1* mutations

| <b>ID</b> | <b>Sex</b> | <b>Age at D0</b> | <b>Cytogenetics</b>                                                                                | <b>Subtype</b>     | <b>Mutation (MAF)</b>                                               | <b>Time to relapse (month)</b> | <b>Overall survival (month)</b> | <b>Outcome</b> |
|-----------|------------|------------------|----------------------------------------------------------------------------------------------------|--------------------|---------------------------------------------------------------------|--------------------------------|---------------------------------|----------------|
| 584       | F          | 4.16             | 52,XX,+3,+10,+14,+17,+21,+X                                                                        | Hyperdiploidy      | <i>FPGS</i> _p.R419W(15%)                                           | 37                             | 57                              | Deceased       |
| 662       | M          | 7.02             | 46,XY[5]                                                                                           | <i>ETV6-RUNX1</i>  | <i>FPGS</i> _p.R141H(37%)                                           | 21                             | 33                              | Deceased       |
| 162       | M          | 4.16             | 48,XY, +der(7)t(7;22)(p13;q11), dic(9:20)(p11;q11),+21,-22, +mar1,+mar2[5]/49,idem,+21[1]/46,XY[2] | Other              | <i>FPGS</i> _p.V136F(29%);<br><i>FPGS</i> _p.K215_V218delinsSP(43%) | 31                             | 66                              | Deceased       |
| 196       | F          | 3.50             | i8q,-15q,-12p,i17q                                                                                 | Other              | <i>NT5C2</i> _p.R39Q(11%)                                           | 24                             | 35                              | Deceased       |
| 434       | F          | 9.50             | 46,XX[18]/47,XX,+8[2]                                                                              | <i>TCF3-ZNF384</i> | <i>NT5C2</i> _p.R39Q(26%)                                           | 33                             | 38                              | Deceased       |
| 544       | F          | 7.50             | 46,XX[8]                                                                                           | Other              | <i>NT5C2</i> _p.R39Q(20%)                                           | 29                             | 41                              | Deceased       |
| 717       | M          | 13.14            | No mitosis                                                                                         | T-ALL              | <i>NT5C2</i> _p.R367Q(41%)                                          | 6                              | 12                              | Deceased       |
| 17        | M          | 2.28             | 46,XY[20]                                                                                          | Other              | <i>NT5C2</i> _p.R238W(8%);<br><i>PRPS1</i> _p.P106A(6%)             | 15                             | 23                              | Deceased       |
| 68        | M          | 7.56             | 46,XY,t(9;22)(q34;q11)[6]/46,XY[2]/ 45,XY,idem, der(20)t(20;21)(q13;q11),-21[2]                    | <i>BCR-ABL1</i>    | <i>PRPS1</i> _p.A190T(13%)                                          | 6                              | 20                              | Deceased       |

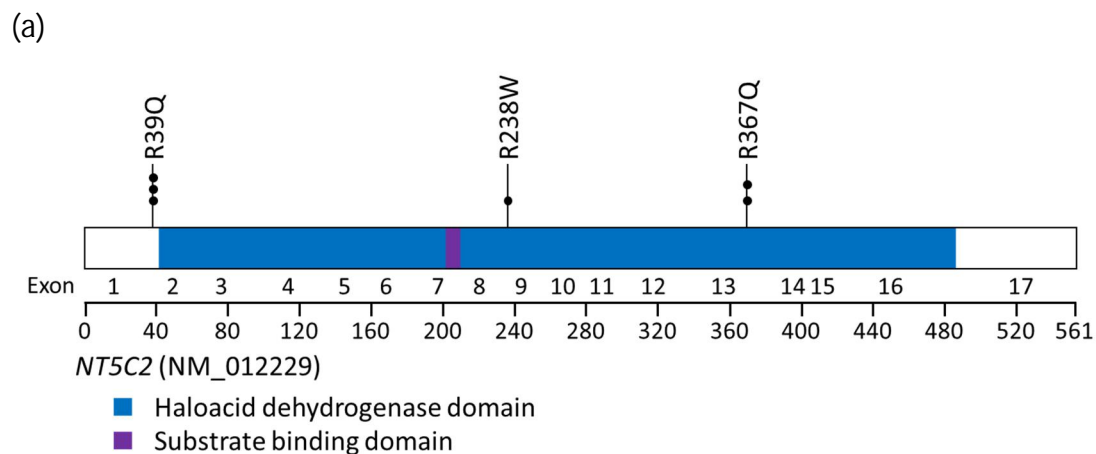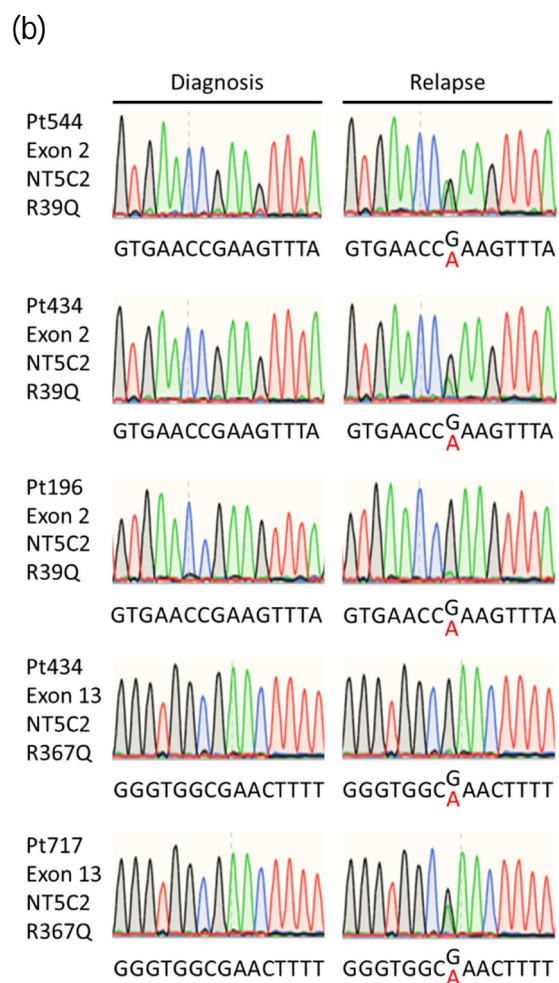

**Supplementary Figure 1.** *NT5C2* mutations in relapsed pediatric ALL. (a) Schematic representation of the structure of the *NT5C2* protein. The haloacid dehydrogenase domain and substrate binding domain are indicated. *NT5C2* mutations identified in relapsed pediatric samples are shown. Filled circles represent heterozygous mutations. (b) DNA sequencing chromatograms of paired diagnosis and relapse genomic ALL DNA samples showing representative examples of relapse-specific heterozygous *NT5C2* mutations, with the mutant allele sequence highlighted in red.

(a)

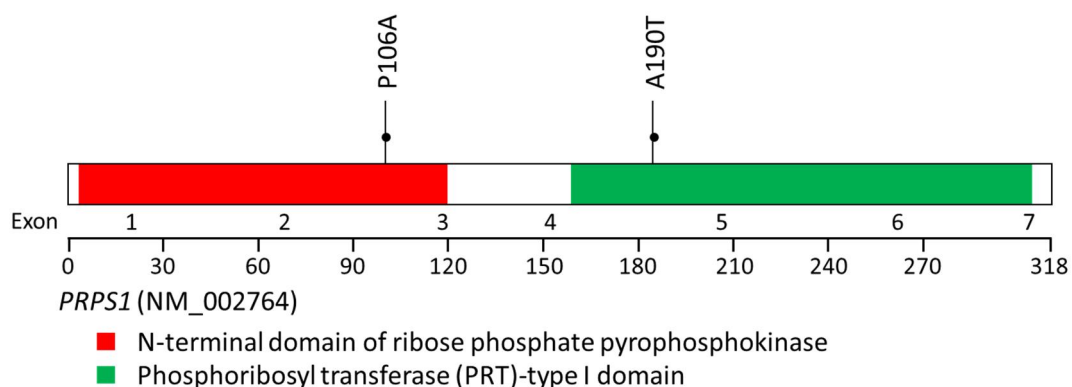

(b)

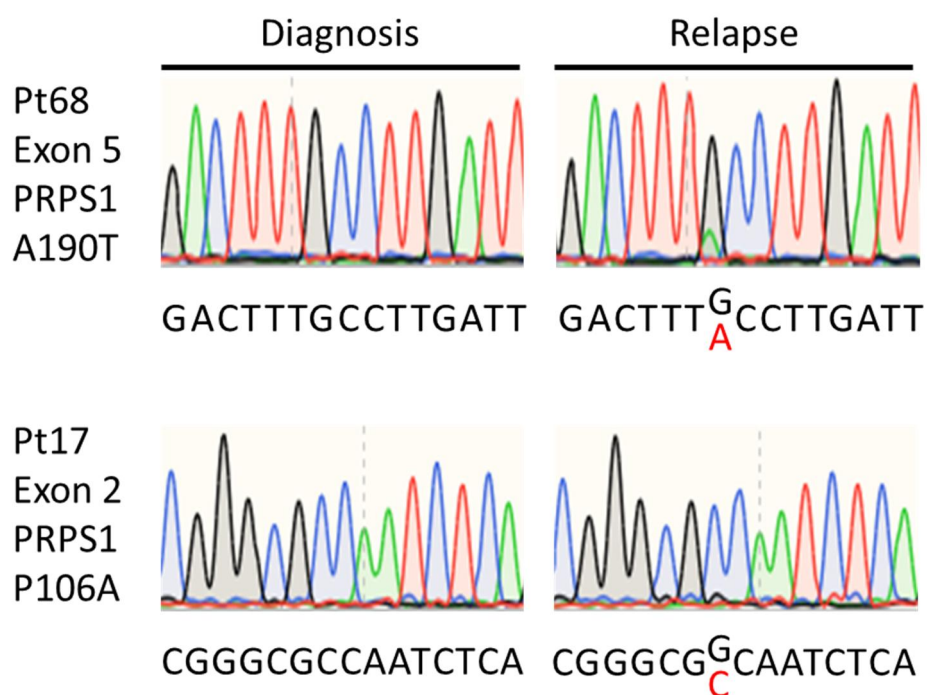

**Supplementary Figure 2.** *PRPS1* mutations in relapsed pediatric ALL. (a) Schematic representation of the structure of the *PRPS1* protein. The N-terminal domain of ribose phosphate pyrophosphokinase and phosphoribosyl transferase (PRT)-type I domain are indicated. *PRPS1* mutations identified in relapsed samples are shown. Filled circles represent heterozygous mutations. (b) DNA sequencing chromatograms of paired diagnosis and relapse genomic ALL DNA samples showing representative examples of relapse-specific heterozygous *PRPS1* mutations, with the mutant allele sequence highlighted in red.
